# Supplementary material for: L1 Hybridization Enrichment: A Method for Directly Accessing De Novo L1 Insertions in the Human Germline
Source: PubMed Central journal article supplement (PMC3412225; doi:10.1002/humu.21533), 2011-05-10
Supplement: humu0032-0978-SD1.pdf [file humu0032-0978-SD1.pdf]

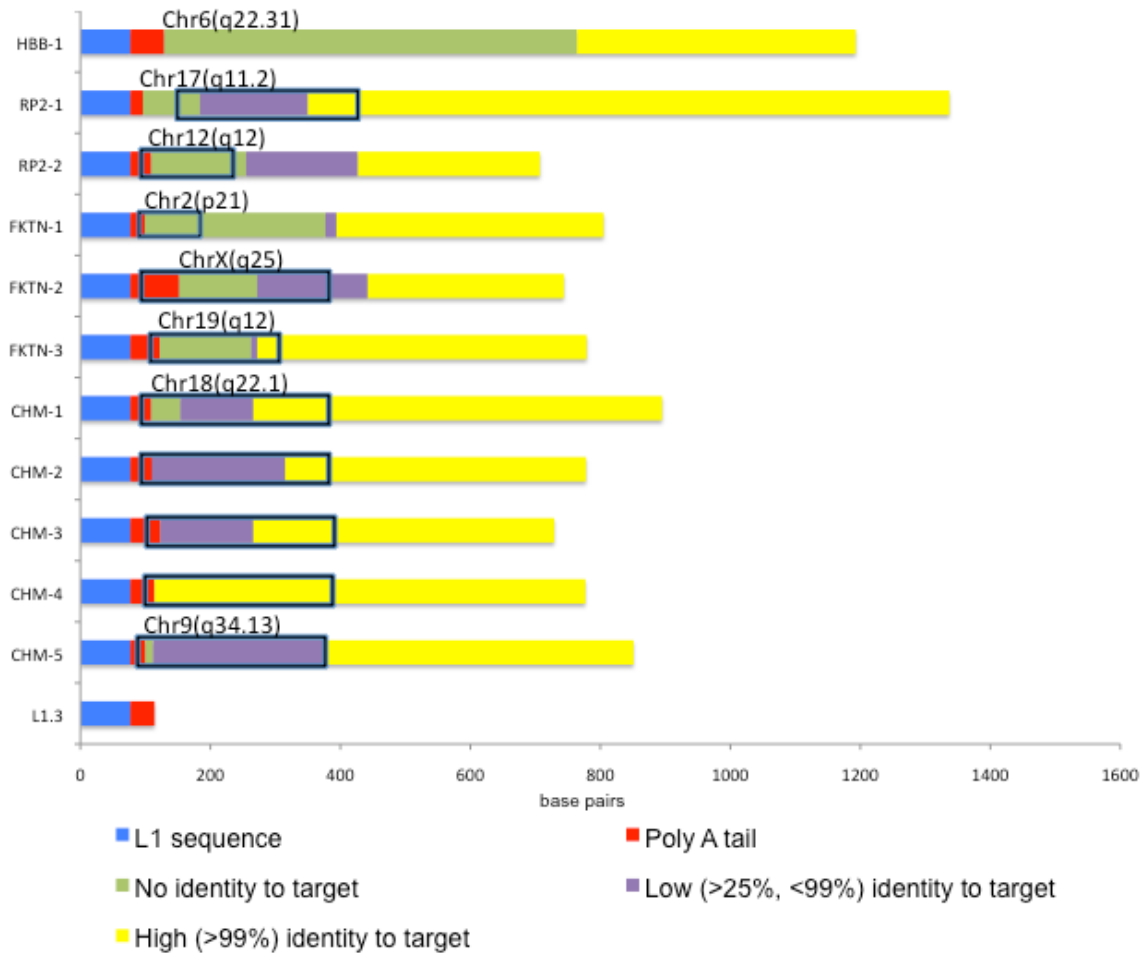

**Supp. Figure S1.** Structures of the 3' ends of 11 potential *de novo* L1 insertions recovered by hybridisation enrichment, aligned to the human-specific L1 insertion, L1.3 (L19088). The names of the sequences include the target locus from which they originate. Bars are coloured to show the origin of the sequence: the L1 sequence is blue, the L1 poly A tail is red, regions of no alignable identity to the target locus are green (with chromosome origin shown above, where identified), regions of intermediate identity to the target sequence (>25% to <99%) are purple, and regions of high (>99%) identity to the target sequence are yellow. Regions containing Alu sequences likely involved in template switching are boxed and the size of the boxes reflects the length of the Alu tract.

**Supp. Table S1. Biotinylated oligonucleotides used for hybridisation enrichment**

| <b>Bio-oligo ID</b> | <b>Sequence (5'- 3')</b> | <b>Position (L1.3<sup>1</sup>)</b> |
|---------------------|--------------------------|------------------------------------|
| bio-L1U1            | bio-GGCACATGTATACATATG   | 5956                               |
| bio-L1U2            | bio-GAAATACCATTTGACCCA   | 5489                               |
| bio-L1U3            | bio-TGACAAAGGGCTAATATC   | 5124                               |
| bio-L1U4            | bio-ACTACCTGACTTCAAAC    | 4602                               |

<sup>1</sup> The location of each bio-oligo with respect to L1.3 (accession L19088)

**Supp. Table S2. Primary target site PCR primers used for multiplex PCR and their optimised concentrations**

| Target Locus          | Primer ID | Sequence                  | Working concentration ( $\mu\text{M}$ ) | Accession Number | Location <sup>1</sup> | Size, bp <sup>2</sup> |
|-----------------------|-----------|---------------------------|-----------------------------------------|------------------|-----------------------|-----------------------|
| HBB                   | PFHBBTF1  | ATTTGCCTGGTATGCCTGGG      | 0.07                                    | ac104389         | 175485                | 5005                  |
|                       | PFHBBTR1  | CCTTGAAGCCAGGATGATGG      | 0.07                                    | ac104389         | 180490                |                       |
| DMD                   | PFDMDTF1  | GTGCTTTAGACATTACCCAGG     | 0.12                                    | al031643         | 111421                | 4908                  |
|                       | PFDMDTR1  | CAACACATCTCTTCATACAGAGGTG | 0.12                                    | al031643         | 116329                |                       |
| F9                    | PFFIXTF1  | CACTGAGACCCCCTTCGG        | 0.08                                    | al033433         | 17106                 | 5551                  |
|                       | PFFIXTR1  | CTGGTATAGTGCTGAGACAGG     | 0.08                                    | al033433         | 22657                 |                       |
| MHC2                  | PFMH2TF1  | TGCAGGGGCAGAAGAGGG        | 0.15                                    | al662845         | 32532                 | 5017                  |
|                       | PFMH2TR1  | CCCCCTTGCTTGCTAAGGG       | 0.15                                    | al662845         | 37549                 |                       |
| CHM                   | PFCHMTF1  | TGAATGCTGGTTGTGGGAGG      | 0.05                                    | al009175         | 57913                 | 5677                  |
|                       | PFCHMTR1  | ACCATCTATGGTGCTGCTGG      | 0.05                                    | al009175         | 63590                 |                       |
| APC                   | PFAPCTF1  | GGAAGCATTATGGGACATGG      | 0.025                                   | ac008575         | 127059                | 5416                  |
|                       | PFAPCTR1  | CCTGAACAGACGAATGTGTGG     | 0.025                                   | ac008575         | 132475                |                       |
| CYBB                  | PFCGDTF1  | GTTGGCTAACCATCAGAGGG      | 0.07                                    | al627245         | 38073                 | 5159                  |
|                       | PFCGDTR1  | CAGCAAACCTGAGGGATTGGG     | 0.07                                    | al627245         | 43232                 |                       |
| RP2                   | PFRP2TF1  | CACAGAAGAGGATTGGGAGG      | 0.03                                    | al050307         | 86064                 | 4773                  |
|                       | PFRP2TR1  | TCTGTCATGCCCAACCTCTG      | 0.03                                    | al050307         | 90837                 |                       |
| FKTN                  | PFFCMTF1  | CCTTTCGGAAGAGTGCAAAGG     | 0.1                                     | al158070         | 94766                 | 5078                  |
|                       | PFFCMTR1  | TGGAGCTAAGGTTTCCCAGG      | 0.1                                     | al158070         | 99844                 |                       |
| HOXD                  | PFHODTF1  | TTCGGTTCCTTCTCTGCTGG      | 0.1                                     | ac009336         | 84862                 | 4264                  |
|                       | PFHODTR1  | CTCCTAAAATGGCTCCCTGG      | 0.1                                     | ac009336         | 89126                 |                       |
| Control               | PFLRCtrlA | TTAGGACGCCCACTACTGTG      | 0.1                                     | ac008706         | 73112                 | 12805                 |
|                       | PFLRCtrlB | GCCAATCCTGTAAGGCAAAGGG    | 0.1                                     | ac008706         | 85917                 |                       |
| Al121819 L1 insertion | PF819LRA  | CCTGCTTTCACCTCACAGGG      | 0.05                                    | al121819         | 105131                | 6454                  |
|                       | PF819LRB  | CAGGTAGAAACTTCCCAGGG      | 0.05                                    | al121819         | 111585                |                       |

<sup>1</sup> Location of the primer within the sequence accession; <sup>2</sup> Length of the primary PCR amplicon.

**Supp. Table S3. PCR primers used for secondary TSP multiplex PCRs**

| Target Locus              | Primer ID | Sequence              | Concentration ( $\mu$ M) | Accession Number | Location <sup>1</sup> | Size, bp <sup>2</sup> |
|---------------------------|-----------|-----------------------|--------------------------|------------------|-----------------------|-----------------------|
| HBB                       | PFHBBTF2  | CCTTGAAGCCAGGATGATGG  | 0.05                     | ac104389         | 175627                | 4724                  |
|                           | PFHBBTR2  | AGCCAGAAGCACCATAAGGG  | 0.05                     | ac104389         | 180351                |                       |
| DMD                       | PFDMDTF2  | GTACCTCACAGCATAGAGGG  | 0.05                     | al031643         | 111738                | 4429                  |
|                           | PFDMDTR2  | GTTCTGTGTTGTGACAGAGGG | 0.05                     | al031643         | 116167                |                       |
| F9                        | PFFIXTF2  | TCTATGGAAGCTCTCCCCTGG | 0.05                     | al033433         | 17217                 | 5226                  |
|                           | PFFIXTR2  | GCCATACGAACATGGAGTGG  | 0.05                     | al033433         | 22443                 |                       |
| MHC2                      | PFMH2TF2  | TAGCAACTGACTCCATGAGG  | 0.05                     | al662845         | 32604                 | 4814                  |
|                           | PFMH2TR2  | GAAACCTGGATAGAGACGTGG | 0.05                     | al662845         | 37418                 |                       |
| CHM                       | PFCHMTF2  | ACCCTGAAGGAGACTTCTGG  | 0.05                     | al009175         | 57972                 | 5404                  |
|                           | PFCHMTR2  | CCTCACAAAGGACATAGGTGG | 0.05                     | al009175         | 63376                 |                       |
| APC                       | PFAP2TR2  | GACCTAGTGGGAGAAGCTGG  | 0.05                     | ac008575         | 127170                | 5234                  |
|                           | PFAPCTF2  | TAGGCCTGCGAAGTACAAGG  | 0.05                     | ac008575         | 132404                |                       |
| CYBB                      | PFCGDTF2  | TCCTCACCTCATGTGTGGAG  | 0.05                     | al627245         | 38145                 | 4985                  |
|                           | PFCGDTR2  | CACGTACAATTCGTCTGGGTG | 0.05                     | al627245         | 43130                 |                       |
| RP2                       | PFRP2TF2  | GGTACAATTCTTGAGGGGGTG | 0.05                     | al050307         | 86090                 | 4697                  |
|                           | PFRP2TR2  | TCTGTCATGCCAACCTCTG   | 0.05                     | al050307         | 90787                 |                       |
| FKTN                      | PFFCMTF2  | TGGCTGAGCAGTGGAAGTTG  | 0.05                     | al158070         | 94837                 | 4900                  |
|                           | PFFCMTR2  | TTGGACTGACAAACCCAGGG  | 0.05                     | al158070         | 99737                 |                       |
| HOXD                      | PFHODTF2  | CCTTAAGGCTTCCACGTTGG  | 0.05                     | ac009336         | 84995                 | 4052                  |
|                           | PFHODTR2  | CGGGTCTTTATGTGTCTGGG  | 0.05                     | ac009336         | 89047                 |                       |
| Al121819 flanking primers | PF819LRC  | TGTTCTCACAGCCTGACAGG  | 0.05                     | al121819         | 105208                | 6328                  |
|                           | PF819LRD  | CTGGCTTGTAGGTACCAAGG  | 0.05                     | al121819         | 111536                |                       |

<sup>1</sup> Location of primer within the sequence accession; <sup>2</sup> Length of secondary PCR amplicon in base pairs.
